# Supplementary material for: Engineering Composites Made from Wood and Chicken Feather Bonded with UF Resin Fortified with Wollastonite: A Novel Approach
Source: MDPI journal article supplement (doi:10.3390/polym12040857), 2020-04-07
Supplement: s1 [file s1]

Supplementary Materials

# Engineering Composites Made from Wood and Chicken Feather Bonded with UF resin Fortified with Wollastonite: A Novel Approach

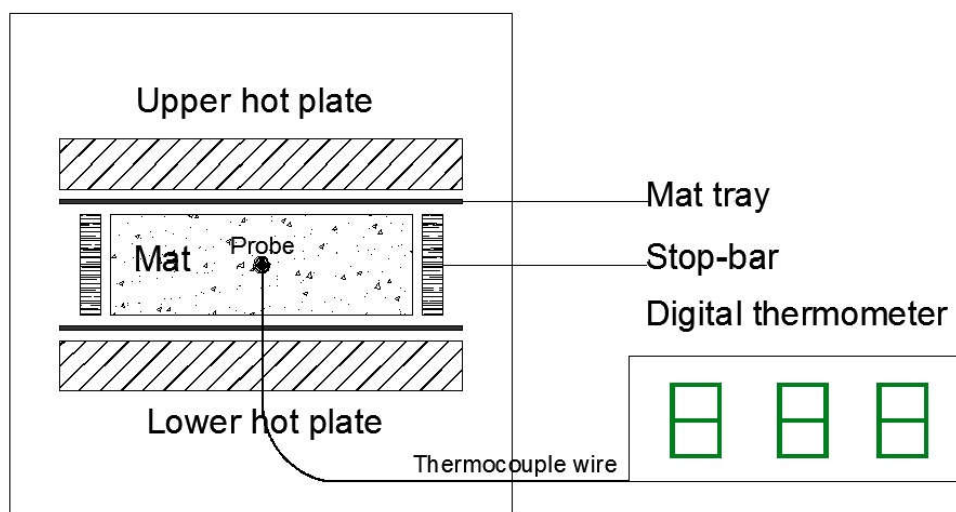

**Figure S1.** Temperature measurement at the core of the mat with 5-second intervals with a digital thermometer using a thermocouple probe inserted into the center of the core of the MDF-mat

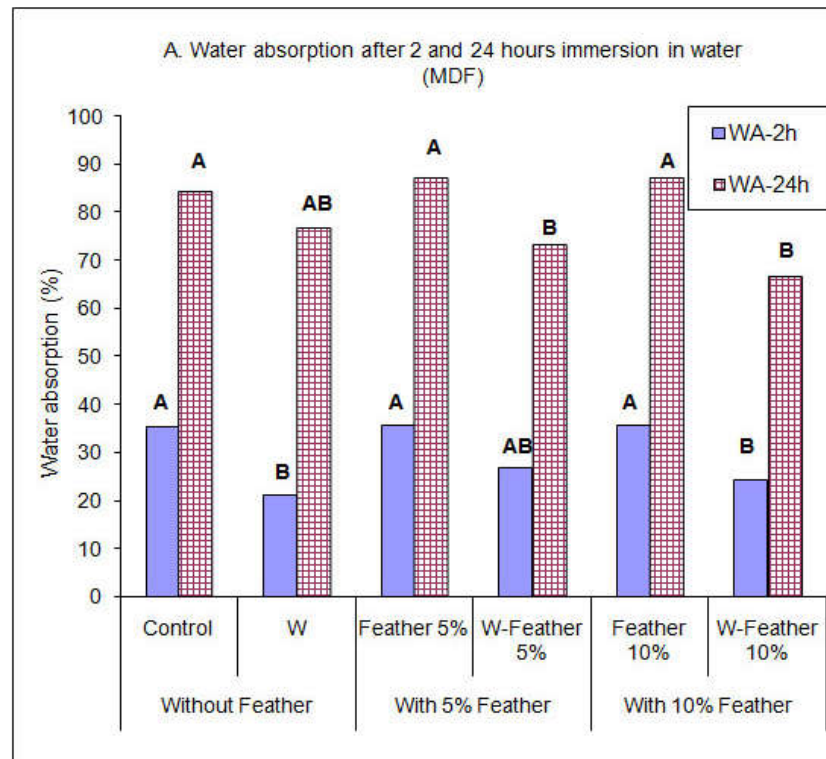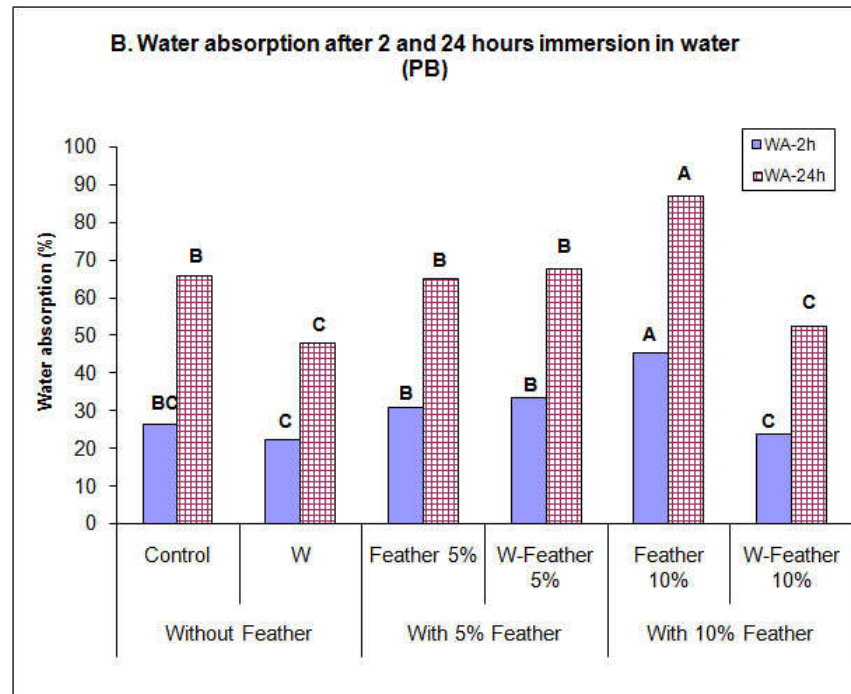

**Figure S2.** Water absorption (%) in medium-density fiberboard (A) and particleboard (B) panels after 2 and 24 hours immersion in distilled water (MDF=medium-density fiberboard; PB = particleboard panels; NW=nano-wollastonite; WA = water absorption).

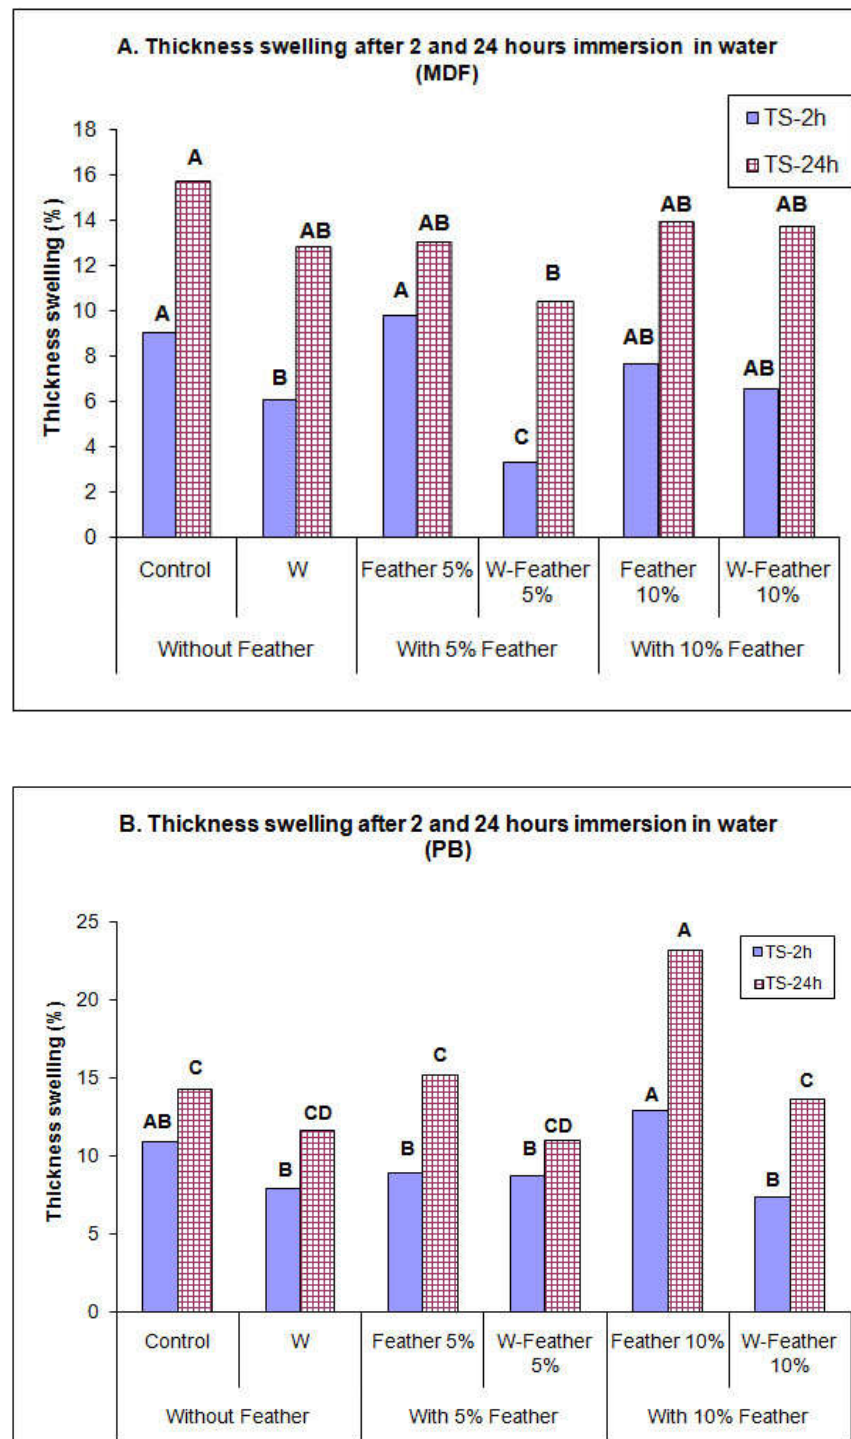

**Figure S3.** Thickness swelling (%) in medium-density fiberboard (A) and particleboard (B) panels after 2 and 24 hours immersion in distilled water (MDF=medium-density fiberboard; PB = particleboard panels; NW=nano-wollastonite; TS = thickness swelling)

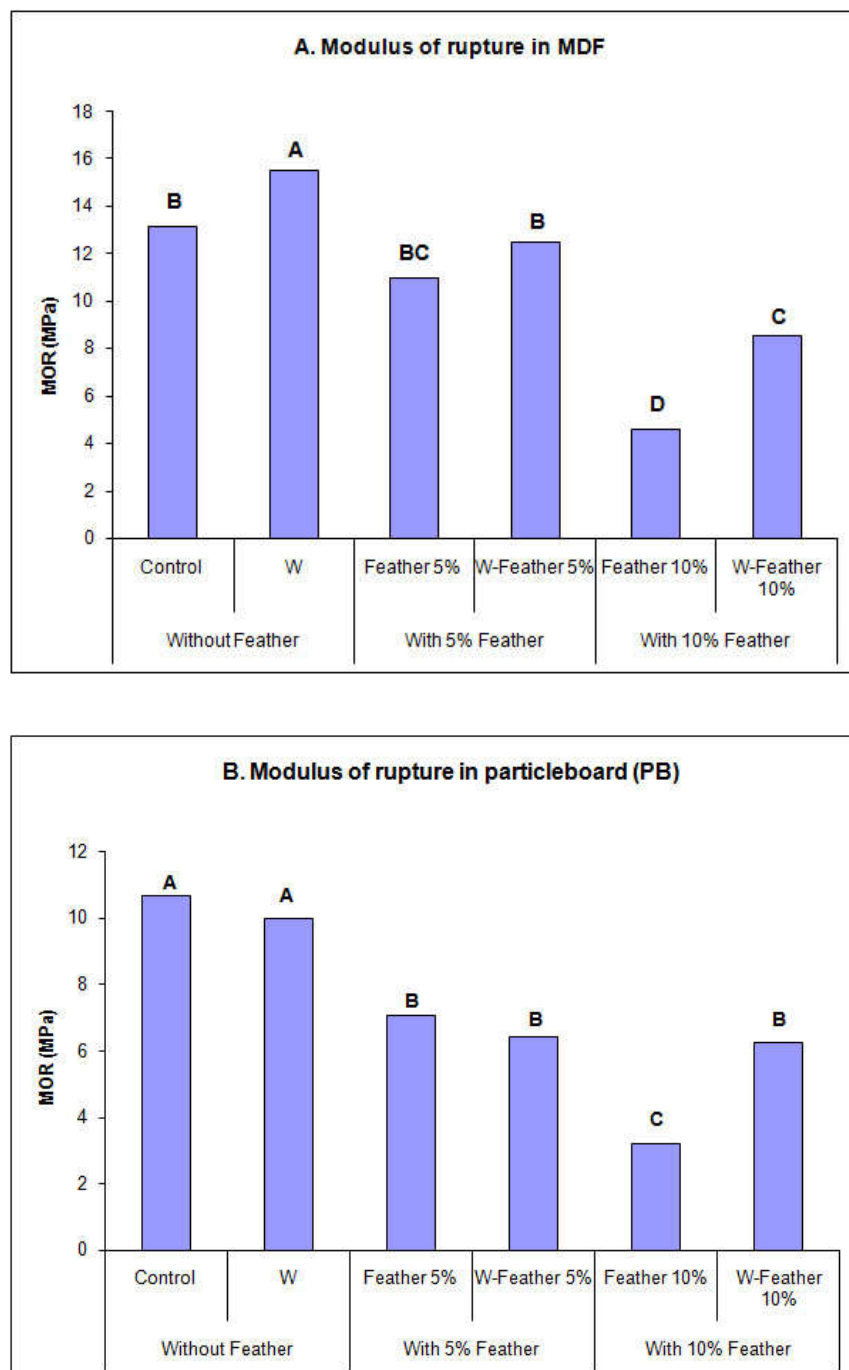

**Figure S4.** Modulus of rupture (MPa) in medium-density fiberboard (A) and particleboard (B) panels (MDF=medium-density fiberboard; PB = particleboard panels; NW=nano-wollastonite)

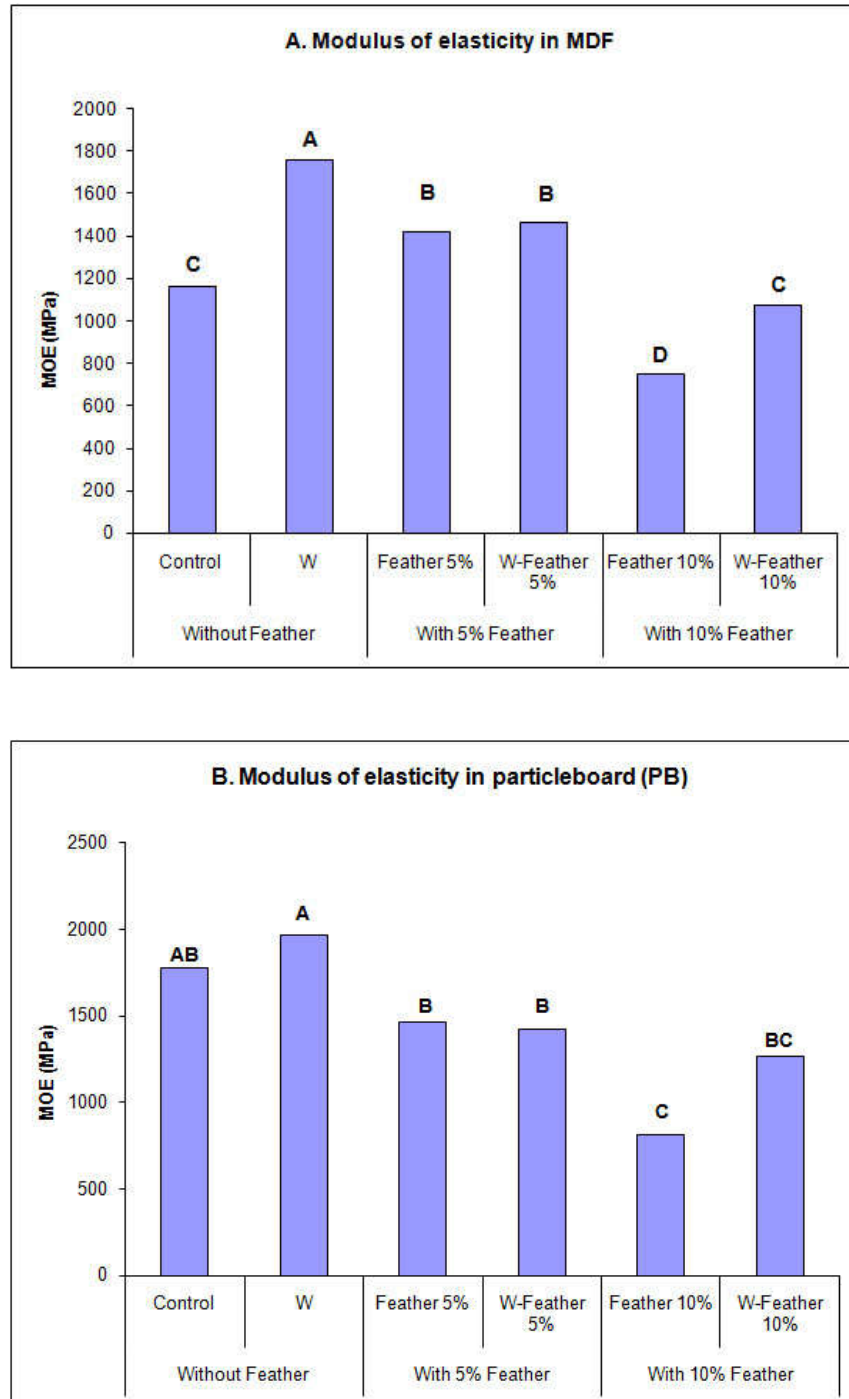

**Figure S5.** Modulus of elasticity (MPa) in medium-density fiberboard (A) and particleboard (B) panels (MDF=medium-density fiberboard; PB = particleboard panels; NW=nano-wollastonite)

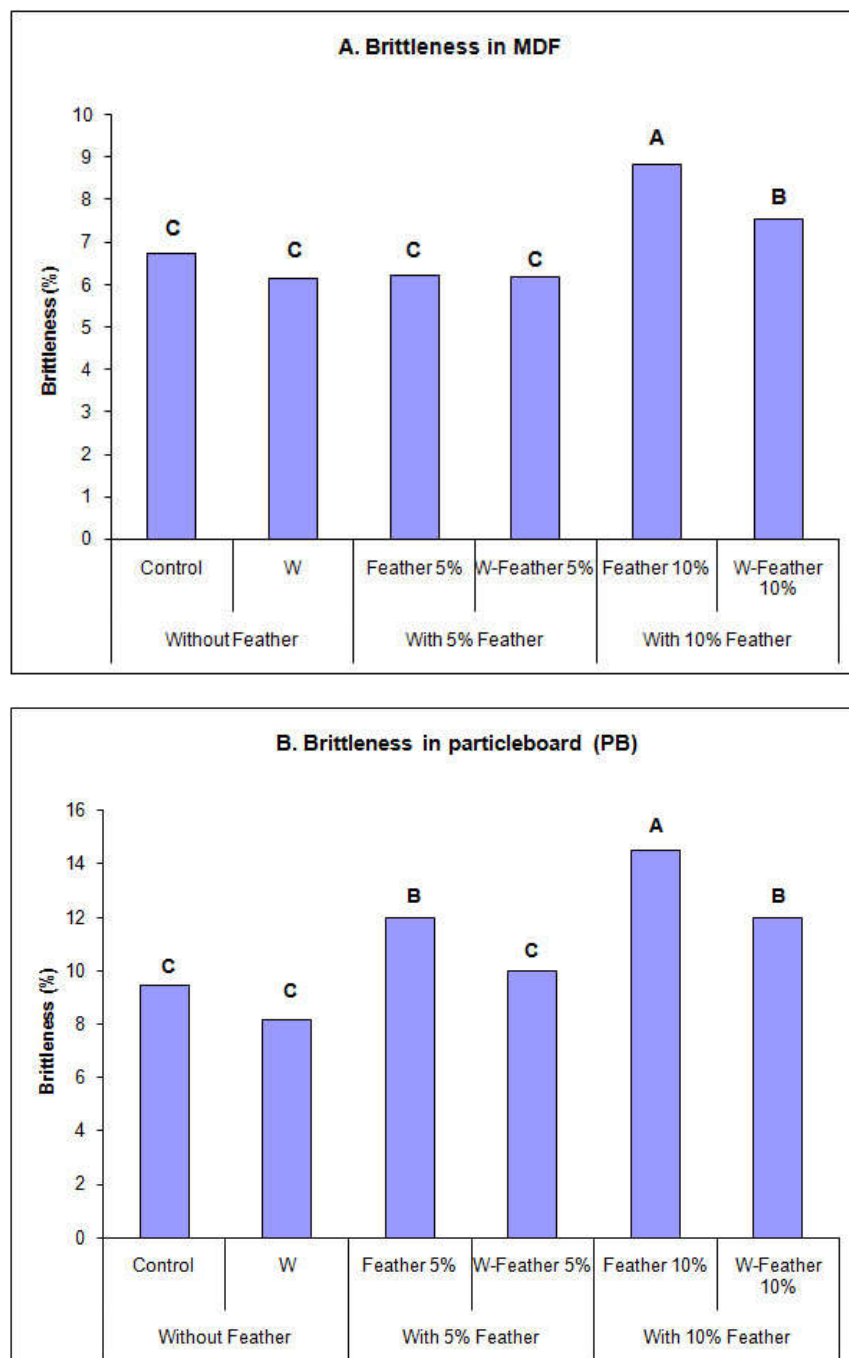

**Figure S6.** Brittleness (%) in medium-density fiberboard (A) and particleboard (B) panels (MDF = medium-density fiberboard; PB = particleboard panels; NW = nano-wollastonite)

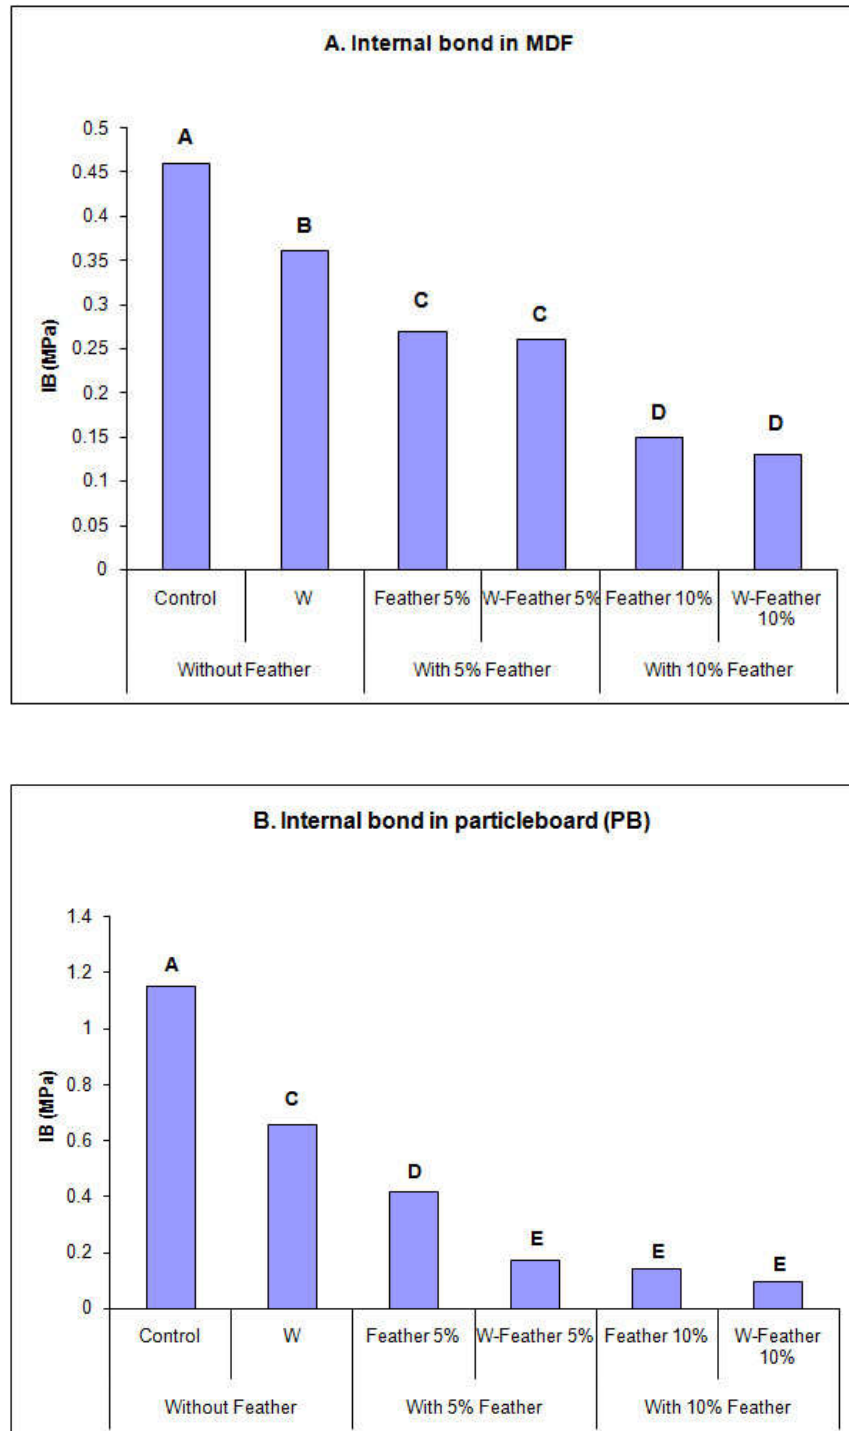

**Figure S7.** Internal bond (MPa) in medium-density fiberboard (A) and particleboard (B) panels (MDF = medium-density fiberboard; PB = particleboard panels; NW = nano-wollastonite)



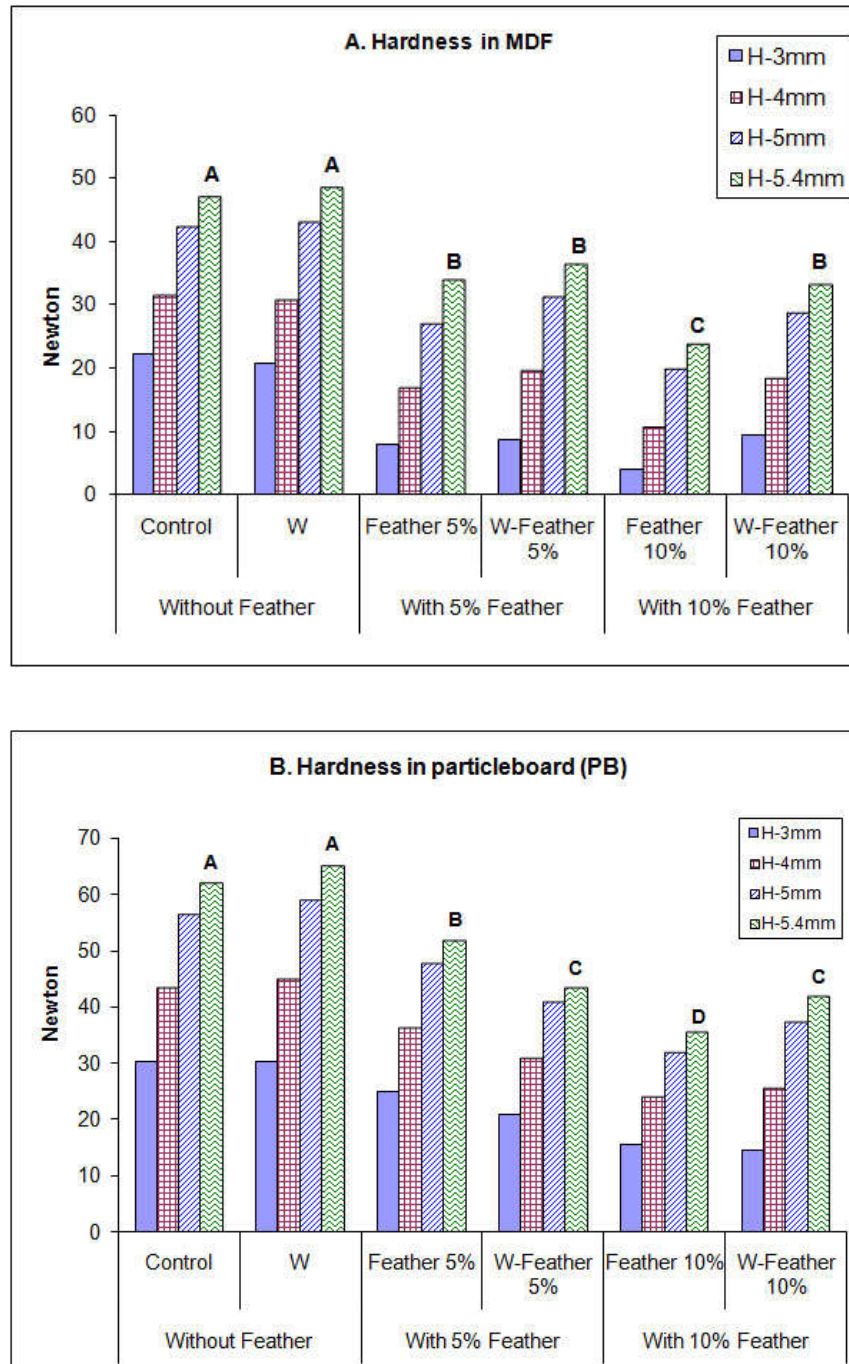

**Figure S8.** Hardness (N) in medium-density fiberboard (A) and particleboard (B) panels after 3, 4, 5, and 5.4 mm of penetration into the MDF-matrix (MDF = medium-density fiberboard; PB = particleboard panels; NW = nano-wollastonite)
